# Supplementary material for: Recalibrating disease parameters for increasing realism in modeling epidemics in closed settings
Source: Springer Nature journal article supplement (doi:10.1186/s12879-016-2003-3), 2016-11-14
Supplement: MOESM1 [file 12879_2016_2003_MOESM1_ESM.pdf]

Supplementary Information  
Recalibrating disease parameters for increasing realism in modeling  
epidemics in closed settings

Livio Bioglio<sup>1</sup>, Mathieu Génois<sup>2</sup>, Christian L. Vestergaard<sup>2</sup>, Chiara Poletto<sup>3,4</sup>, Alain Barrat<sup>2,5</sup>, and Vittoria Colizza<sup>3,4,5</sup>

<sup>1</sup>INVS: French Institute for Public Health Surveillance

<sup>2</sup>Aix Marseille Univ, Université Toulon, CNRS, CPT

<sup>3</sup>Sorbonne Universités, UPMC Univ Paris 06, UMR-S 1136, Institut Pierre Louis  
d'Epidémiologie et de Santé Publique, F-75013

<sup>4</sup>INSERM, UMR-S 1136, Institut Pierre Louis d'Epidémiologie et de Santé Publique,  
F-75013

<sup>5</sup>ISI Foundation

September 22, 2016

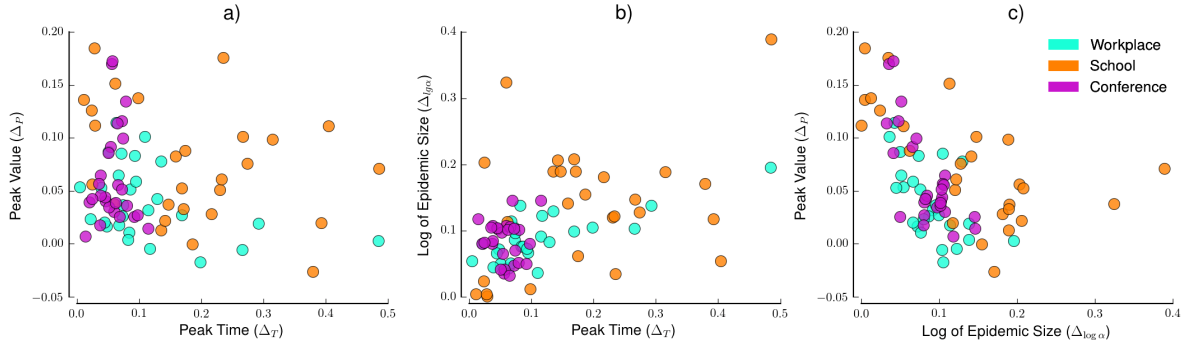

Figure S1: Correlation between relative differences  $\Delta$ .

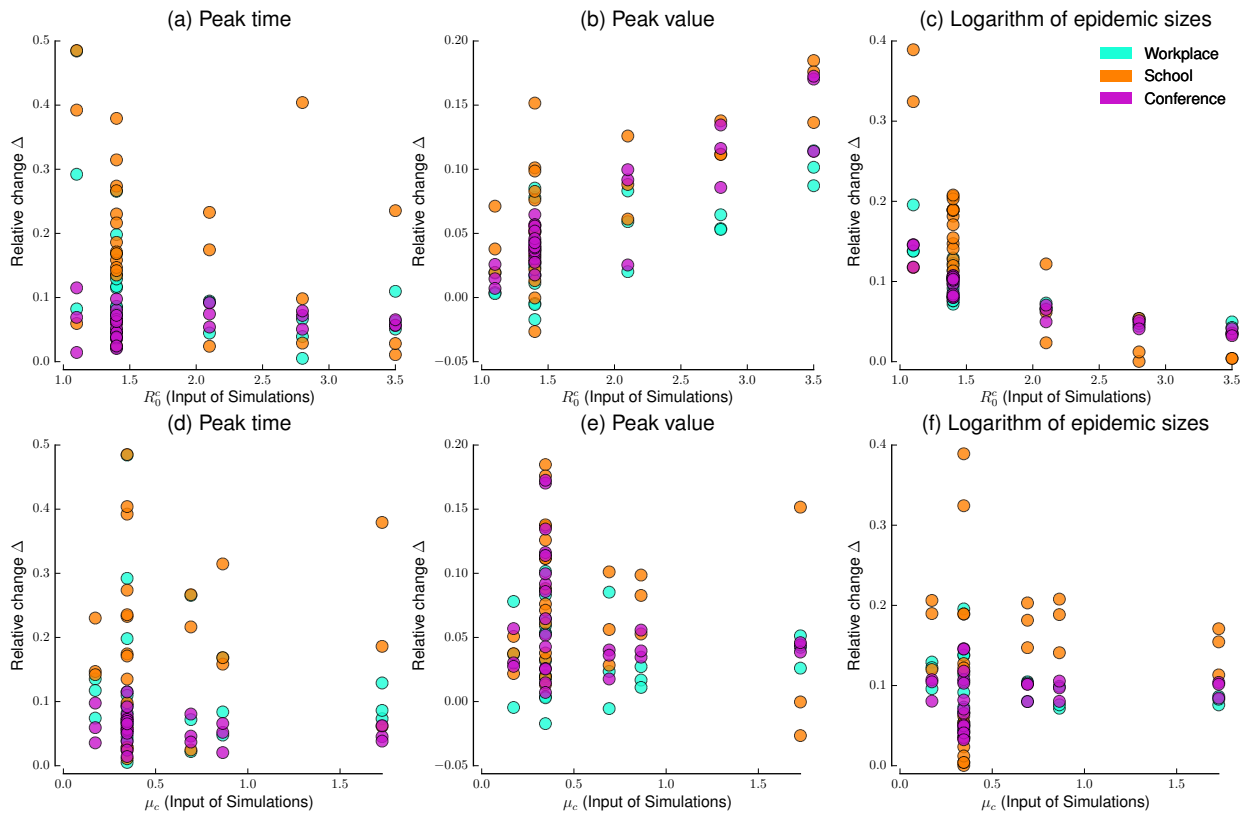

Figure S2: Dependence of relative variations  $\Delta$  on epidemic parameters.

Table S1: Correlations between relative variations  $\Delta$  and reproductive number  $R_0^c$ .

| Location (Full) | $\Delta_T$ vs. $R_0^c$ |            | $\Delta_P$ vs. $R_0^c$ |             | $\Delta_{\log \alpha}$ vs. $R_0^c$ |             |
|-----------------|------------------------|------------|------------------------|-------------|------------------------------------|-------------|
|                 | $r$ [95%CI]            | $p$ -value | $r$ [95%CI]            | $p$ -value  | $r$ [95%CI]                        | $p$ -value  |
| Workplace       | -0.6[-0.9, 0.2]        | 0.1        | 0.4[-0.3, 0.9]         | 0.2         | -0.8[-1.0, -0.2]                   | 0.01        |
| School          | -0.7[-0.9, -0.2]       | 0.02       | 0.6[-0.2, 0.9]         | 0.1         | -0.9[-1.0, -0.6]                   | $< 10^{-3}$ |
| Conference      | -0.07[-0.70, 0.62]     | 0.85       | 1.0[0.9, 1.0]          | $< 10^{-3}$ | -0.9[-1.0, -0.7]                   | $< 10^{-3}$ |

Table S2: Correlations between relative variations  $\Delta$  and recovery rate  $\mu_c$ .

| Location (Full) | $\Delta_T$ vs. $\mu_c$ |            | $\Delta_P$ vs. $\mu_c$ |            | $\Delta_{\log \alpha}$ vs. $\mu_c$ |            |
|-----------------|------------------------|------------|------------------------|------------|------------------------------------|------------|
|                 | $r$ [95%CI]            | $p$ -value | $r$ [95%CI]            | $p$ -value | $r$ [95%CI]                        | $p$ -value |
| Workplace       | -0.2[-0.8, 0.5]        | 0.6        | -0.3[-0.8, 0.4]        | 0.4        | -0.1[-0.7, 0.6]                    | 0.8        |
| School          | -0.2[-0.8, 0.5]        | 0.6        | 0.5[-0.2, 0.9]         | 0.2        | 0.3[-0.4, 0.8]                     | 0.4        |
| Conference      | -0.3[-0.8, 0.4]        | 0.4        | -0.3[-0.8, 0.5]        | 0.5        | 0.2[-0.6, 0.8]                     | 0.6        |
